# Supplementary material
Source: PubMed Central journal article supplement (PMC2664849)
Supplement: NIHMS85002-supplement-1.pdf [file NIHMS85002-supplement-1.pdf]

## List of supplemental materials

### Table S1.

PCR primers for cloning. Megaprime PCR reactions were carried out with the primers indicated and a pair of vector (pcDNA) primers: T7 (upstream) and ZeoSeq (downstream). All sequences are the direction from 5' to 3'. Top: sense strands, Bot: anti-sense strands. Additionally, primers to introduce single K to R mutations in APE1 were designed accordingly. The vector pcDNA3.1Zeo(+) was used for cloning unless noted.

### Fig. S1.

Interaction of APE1 with the wild-type MDM2 by immunoprecipitation assay. The FLAG-enriched fractions were examined with anti-MDM2 antibody N-20 (top). Cells expressing MDM2 and the full-length APE1-FLAG (lane 1), ND42 APE1-FLAG lacking 42 a.a. of the N-terminus (lane 2), the full-length APE without FLAG fusion (lane 3), and the CD20 APE1-FLAG lacking the 20 a.a. of the C-terminus. The input cell lysates (before FLAG precipitation) were analyzed with anti-MDM2 (middle) and anti-FLAG (bottom). Asterisk in the top panel denotes a non-specific signal.

### Fig. S2.

Sequence alignment of the N-terminal 60 amino acid residues in APE1. The protein sequences in Swiss-prot, from top to bottom (accession number): human (P27695), gorilla (A1YES6), orangutan (A2T7I6), pigmy chimpanzee (A1YFZ3), chimpanzee (A2T6Y4), bovine (P23196), rat (P43138), and mouse (P28352). The amino acid sequences were aligned using Clustalw (<http://www.ebi.ac.uk/clustalw/>). The description of the amino acid-coloring is in:

[http://www.ebi.ac.uk/clustalw/clustalw\\_help.html#results](http://www.ebi.ac.uk/clustalw/clustalw_help.html#results)

The tandem ubiquitin acceptor Lys residues (K24, K25, K27) are indicated with the magenta arrows.

| purpose                       | sequence                                                                                                                                          | RE enzymes used                               |
|-------------------------------|---------------------------------------------------------------------------------------------------------------------------------------------------|-----------------------------------------------|
| MDM2 cloning                  | Top: AGGGGATCCACCATGTGCAATACCAACATGTCT<br>Bot: ACACTCGAGCTAGGGGAAATAAGTTAGCAC                                                                     | BamHI+XhoI                                    |
| K[24/25/27]R                  | Top: AGCCAGAGGCCAGGAGGAGTAGGACGGCCGCAA<br>Bot: TTTGCGCCGCTCTACTCCTCCTGGCCTCTGGCT                                                                  | Megaprime with<br>T7&ZeoSeq,<br>BamHI+XhoI    |
| K[31/32/35]R                  | Top: AAGACGGCCGCAAGGAGAAATGACAGAGAGGCAGCAGGAGAG<br>Bot: ZeoSeq                                                                                    | EagI+XhoI                                     |
| His-tagged<br>SUMO cloning    | Top:<br>TTTTGGATCCACCATGGGCAGCAGCCACCACCACCACCACAGCAGCGGC<br>TCTGACCAGGAGGCAAACCTTCAACT<br>Bot: AAAACTCGAGCTAAACTGTTGAATGACCCCCGT                 | BamHI+XhoI                                    |
| His-tagged<br>Nedd8 cloning   | Top1: CATCATCATCATGGTCTAATTAAAGTGAAGACGCTGACC<br>Top2: TTTGGATCCACCATGGTGTCTCATCATCATCATCATGGTCTA<br>Bot: CTGCCTCTCGAGTCATCCTCCTCTCAGAGCCAACACCAG | cascaded PCR<br>(Top1 to Top2),<br>BamHI+XhoI |
| G76A mutation<br>in ubiquitin | Top: T7<br>Bot: CCCTCTAGACTCGAGTCAGGCACCTCTGAGACG                                                                                                 | BamHI+XhoI                                    |
| T7                            | TAATACGACTCACTATAGGG                                                                                                                              |                                               |
| ZeoSeq                        | TGGCTGGCAACTAGAAGG                                                                                                                                |                                               |

**Table S1**

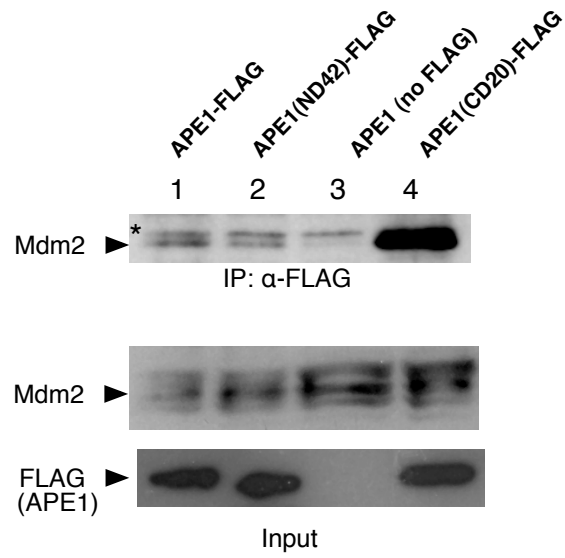

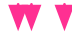

|        |  |             |                                                                  |    |
|--------|--|-------------|------------------------------------------------------------------|----|
| P27695 |  | APEX1_HUMAN | MPKRGKKGAVAEDGDELRLTEPEAKKSKTAAKKNDKEAAGEGPALYEDPPDQKTSPSGKPA    | 60 |
| A1YES6 |  | APEX1_GORGO | MPKRGKKGAVAEDGDELKTEPEAKKSKTAAKKNDKEAAGEGPALYEDPPDQKTSPSGKPA     | 60 |
| A2T7I6 |  | APEX1_PONPY | MPKRGKKGAVAEDGDELKTEPEAKKSKTTAKKNDKEAAGEGPALYEDPPDQKTSPSGKPA     | 60 |
| A1YFZ3 |  | APEX1_PANPA | MPKRGKKGAVAEDGDELRLTEPEAKKSKTAAKKNDKEAAGEGPALYEDPPDQKTSPSGKPA    | 60 |
| A2T6Y4 |  | APEX1_PANTR | MPKRGKKGAVAEDGDELRLTEPEAKKSKTAAKKNDKEAAGEGPALYEDPPDQKTSPSGKPA    | 60 |
| P23196 |  | APEX1_BOVIN | MPKRGKKGAVVEDAEFPKTEPEAKKSKAGAKKNEKEAVGEGAVLYEDPPDQKTSPSGKSA     | 60 |
| P43138 |  | APEX1_RAT   | MPKRGKR-AAAEDGEEPKESEPETKKSKGAAKKTEKEAAGEGPVLYEDPPDQKTSASGKSA    | 59 |
| P28352 |  | APEX1_MOUSE | MPKRGKK-AAADDGEEPKESEPETKKSKGAAKKTEKEAAGEGPVLYEDPPDQKTSPSGKSA    | 59 |
|        |  |             | *****: *..*.*.* ::*:*:*:* *..*.*.*.*.*.*.*.*.*.*.*.*.*.*.*.*.*.* |    |
